# Supplementary material
Source: PubMed Central journal article supplement (PMC6337695)
Supplement: ddy359_conley_et_al-rrct-supplementary_figures-revision.pdf [file ddy359_conley_et_al-rrct-supplementary_figures-revision.pdf]

# SUPPLEMENTARY FIGURES

## Supplementary Figure 1

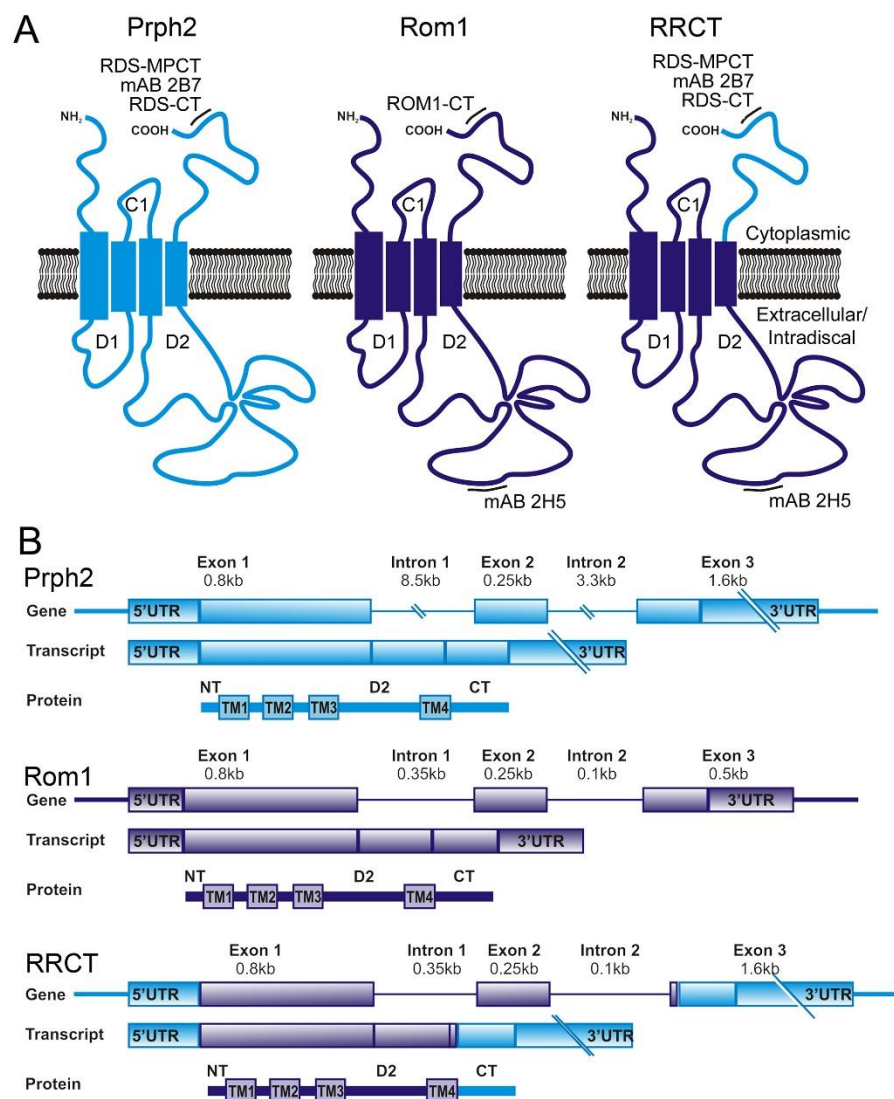

### Supplementary Figure 1. Schematic of the RRCT knockin.

**A.** Shown are diagrams of Prph2 (blue), Rom1 (purple) and RRCT (blue/purple) proteins in the membrane. Antibody names and epitopes are labeled with small black bars. C1, D1, and D2 refer to the cytoplasmic, first and second intradiscal loops, respectively. **B.** Shown is a schematic for the creation of the RRCT knockin, with endogenous Prph2 (blue) endogenous Rom1 (purple) and the RRCT knockin (blue/purple) on the gene, transcript, and protein level.

**Supplementary Figure 2**

|         |     |                                                                |
|---------|-----|----------------------------------------------------------------|
| Prph2   | 1   | ..MA-LLKVKFDQKKRVKLAQGLWLMNWLSVLAGIVLFSLGFLFKIELRKRSEVMNNS-ESH |
| Rom1    | 1   | MAPVLPVVLPLQPRIRLAQGIWLLSWLLALVGGLTLLCSGHLLVQLGHLGTFLAPSCSFP   |
| RRCT    | 1   | MAPVLPVVLPLQPRIRLAQGIWLLSWLLALVGGLTLLCSGHLLVQLGHLGTFLAPSCSFP   |
| TM1     |     |                                                                |
| Prph2   | 58  | FVPNSLIGVGVLSCVFNSLAGKICYDALDPAKYAKWKPWLPYLAVCIF-FNVILFLVAL    |
| Rom1    | 61  | ALPQTALAAGTVALGTGLGGAGASRASLDAAQYPPWRGVLTPLLAVGTAAGGGLLTLALG   |
| RRCT    | 61  | ALPQTALAAGTVALGTGLGGAGASRASLDAAQYPPWRGVLTPLLAVGTAAGGGLLTLALG   |
| TM2 TM3 |     |                                                                |
| Prph2   | 117 | CCFLLRGSLESTLAYGLKNGMKYYRDTDTPGRCFMKKTIDMLQIEFKCCGNNGFRDWFEI   |
| Rom1    | 121 | LALALPVSLNQGLEEGLEAALAHYKDTEVPGRCQAKRLMDELQLRYHCCGRHGYKDWFGV   |
| RRCT    | 121 | LALALPVSLNQGLEEGLEAALAHYKDTEVPGRCQAKRLMDELQLRYHCCGRHGYKDWFGV   |
| TM4     |     |                                                                |
| Prph2   | 177 | QWISNRYLDFSSKEVKDRIKSNVDGRYLVLDGVFPSCCNPSSPRPCIQYQLTNNSAHYSYD  |
| Rom1    | 181 | QWVSNRYLDPSDQDVVDRIQSNVEGLYLIDGVFPSCCNPHSPRPCLQSQLSDPYAHPLFD   |
| RRCT    | 181 | QWVSNRYLDPSDQDVVDRIQSNVEGLYLIDGVFPSCCNPHSPRPCLQSQLSDPYAHPLFD   |
| Prph2   | 237 | HQTEELNLWLRGCRAALLNYYSSLMNSMGVVTLVWLFVVSITAGLRYLHTALESVSNPE    |
| Rom1    | 241 | PRQPNLNLWAQGCHEVLLLEHLQGLSGTLGSILAVTLLLQILVLLGLRYLQTALEGLGGVI  |
| RRCT    | 241 | PRQPNLNLWAQGCHEVLLLEHLQGLSGTLGSILAVTLLLQILVLLGLRYLHTALESVSNPE  |
| TM4     |     |                                                                |
| Prph2   | 297 | DPECESEGWLLEKSVPETWKAFLSFKKLGKSNQVEAEGADAGPAPEAG 346           |
| Rom1    | 301 | DGEGEAQGYLFPGGGLKDILKTAWLQGGLAHKPAPEEAPPDEEPPKEVLAEA 351       |
| RRCT    | 301 | DPECESEGWLLEKSVPETWKAFLSFKKLGKSNQVEAEGADAGPAPEAG 349           |

**Supplementary Figure 2. Alignment of Prph2, Rom1, and RRCT peptide sequences.** Text color indicates changing exon. Underlined Prph2 sequence is replaced with Rom1 sequence in the RRCT allele. TM1-4 indicate the transmembrane regions. Prph2 has a predicted molecular weight of 39.2 kDa (without including glycan), Rom1 has a predicted molecular weight of 37.2 kDa (not glycosylated), and RRCT has a predicted molecular weight of 37.3 kDa (not glycosylated). Yellow is the RDS-D2 epitope. Blue is the hypothetical longer peptide for Rom1 2H5, italics is the hypothetical shorter peptide for 2H5.

## Supplementary Figure 3

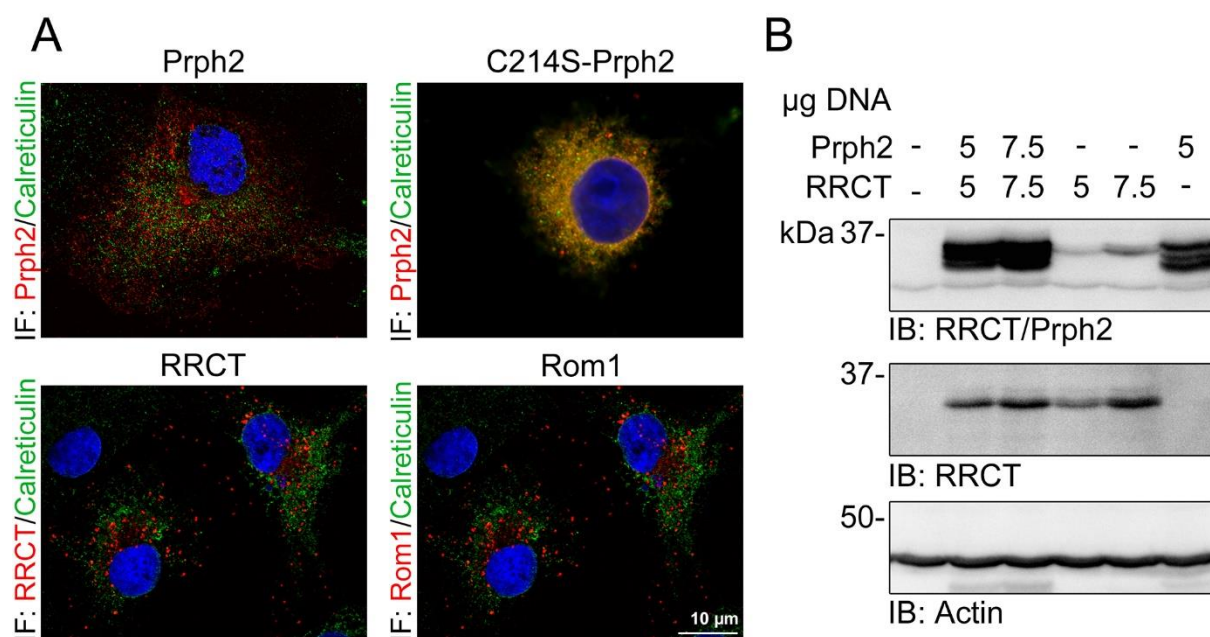**Supplementary Figure 3. Expression of RRCT in transfected cells.**

**A.** COS-7 cells were transiently transfected with Prph2 constructs (either WT or C214S), RRCT, or Rom1 as indicated above each panel. Cells were labeled for Prph2/RRCT (RDS-CT) or Rom1 in red, calreticulin in green, and DAPI in blue. Images captured at 100x, scale bar: 10  $\mu$ m. **B.** COS-7 cells were transiently transfected with Prph2 and/or RRCT in amounts listed above the blots. Cell lysates were collected and separated on reducing SDS-PAGE. Resultant blots were probed for Prph2/RRCT (RDS-CT) or RRCT (mAB 2H5), with actin as a control.

## Supplementary Figure 4

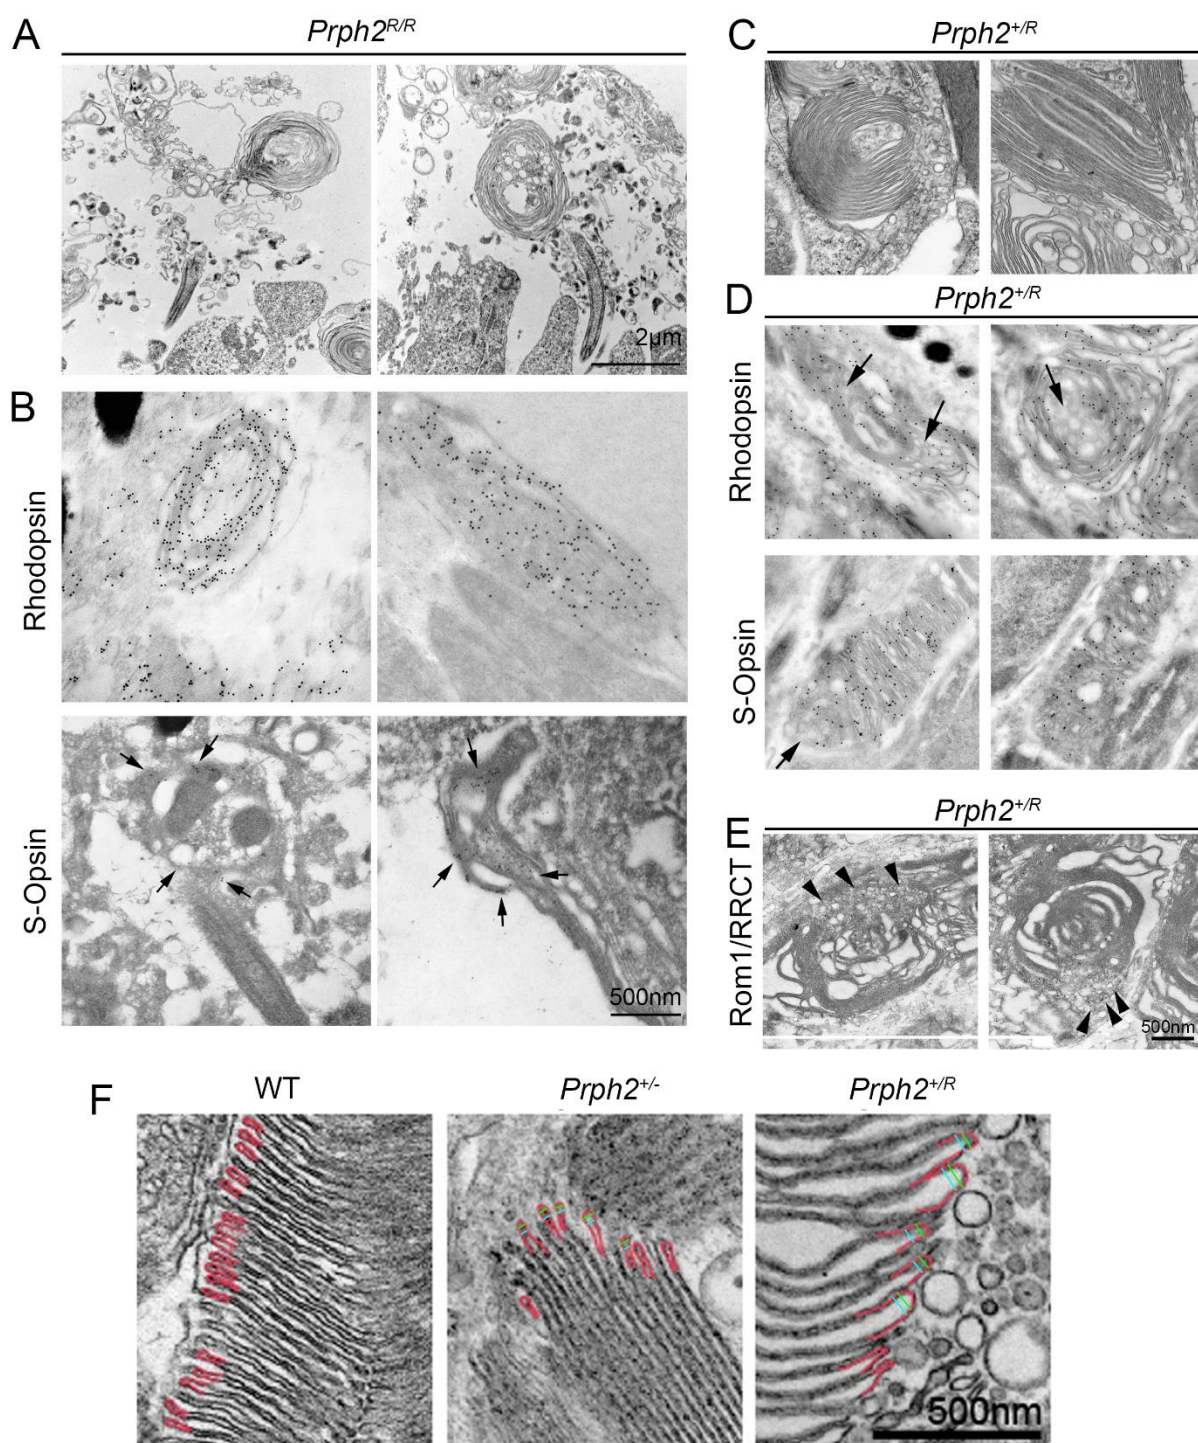

**Supplementary Figure 4. RRCT alone cannot support OS formation while expression of RRCT and WT Prph2 results in accumulation of abnormal vesicular structures.**

**A.** Shown are representative P30 EM images collected at 15,000x. Scale bars 2 $\mu$ m **B.** Rod and cone OSs were identified by immunogold labeling with rhodopsin (Fliesler polyclonal), and S-

opsin (Craft polyclonal) antibodies, respectively (captured at 50,000x). Arrows highlight immunogold particles using the S-opsin antibodies. Scale bars 500nm **C.** Shown are representative P30 EM images collected at 40,000x. Scale bars 500nm **D.** Rod OSs were identified by immunogold labeling with rhodopsin (Fliesler polyclonal) while cone OSs were identified by labeling with S-opsin (Craft polyclonal) antibodies (captured at 25,000x or 30,000x). Arrows indicate vesicular structures largely lacking labeling for rhodopsin and S-opsin. Scale bars 500nm **E.** Rom1/RRCT was largely localized to vesicular structures (arrowheads), identified using mAB 2H5. Images captured at 50,000x. Scale bars 500nm. **F.** Shown are representative EM images captured at 40,000x (images are the same as those presented in Figure 6 for illustrative purposes). A selection of rims has been traced in red to show variations in pinching seen both between and within genotypes. A selection of outer rim diameters have been labeled in green with inner rim diameters labeled in blue. Scale bar 500 nm.

## Supplementary Figure 5

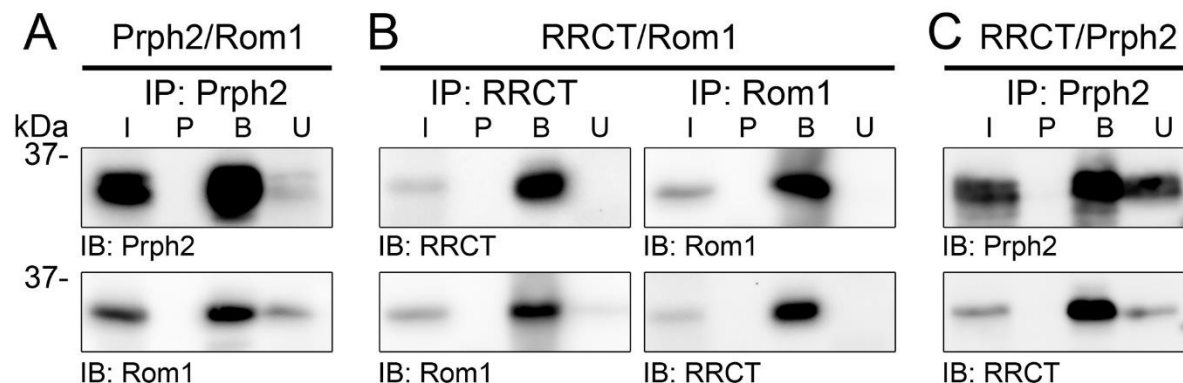

**Supplementary Figure 5. RRCT protein retains the ability to bind Prph2 and Rom1 *in vitro*.** COS7 cells were double transfected with the constructs indicated at the top of each section. **A.** IP was performed for Prph2 (RDS-D2), and blots were probed for Prph2 (mAB 2B7) and Rom1 (mAB 2H5). **B.** IP was performed for RRCT (RDS-CT), and blots were probed for RRCT (mAB 2B7) and Rom1 (ROM1-CT). **C.** IP was performed for Prph2 (RDS-D2) and blots were probed for Prph2 (RDS-D2) and RRCT (mAB 2H5). I: input, P: pre-clear, B: bound, U: unbound.
